# Supplementary material for: Neuronal timescales are functionally dynamic and shaped by cortical microarchitecture
Source: eLife journal article supplement (doi:10.7554/elife.61277), 2020-11-23
Supplement: supp [file elife-61277-supp-v1.zip]

Archive with 12 entries (12 files):
- elife_poa_e61277_Transparent_Reporting_File.pdf
- elife_poa_e61277_Figure_2_figure_supplement_1.pdf
- elife_poa_e61277_Figure_2_figure_supplement_2.pdf
- elife_poa_e61277_Figure_2_figure_supplement_3.pdf
- elife_poa_e61277_Figure_2_figure_supplement_4.pdf
- elife_poa_e61277_Figure_3_figure_supplement_1.pdf
- elife_poa_e61277_Figure_3_figure_supplement_2.pdf
- elife_poa_e61277_Figure_4_figure_supplement_1.pdf
- elife_poa_e61277_Figure_4_figure_supplement_2.pdf
- elife_poa_e61277_Supplementary_file_1.docx
- elife_poa_e61277_Supplementary_file_2.docx
- elife_poa_e61277_Supplementary_file_3.docx
