# Supplementary material for: Neuronal timescales are functionally dynamic and shaped by cortical microarchitecture
Source: eLife journal article supplement (doi:10.7554/elife.61277), 2020-11-23

**A** parcel confidence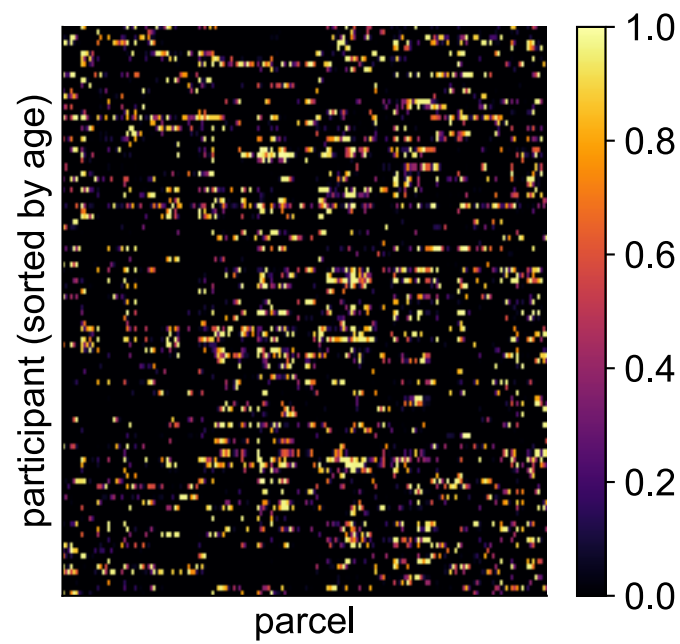**B** parcel maxconfidence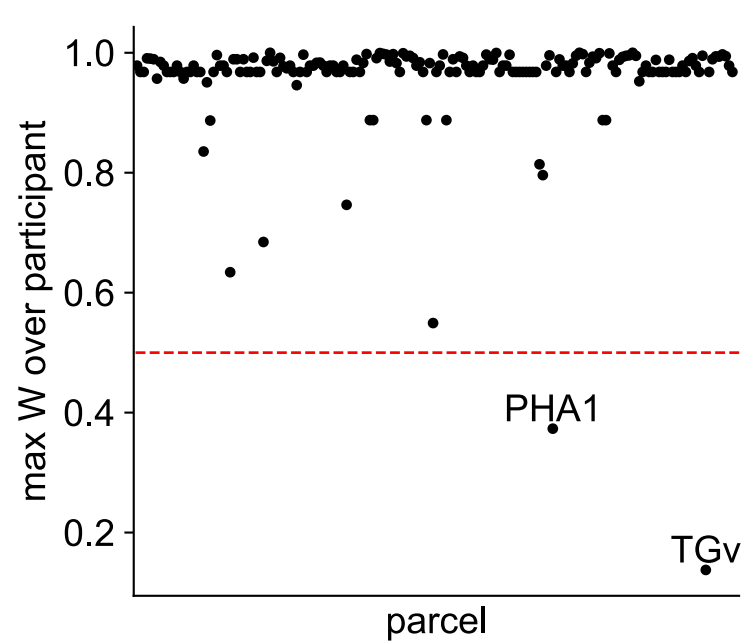**C** coverage by age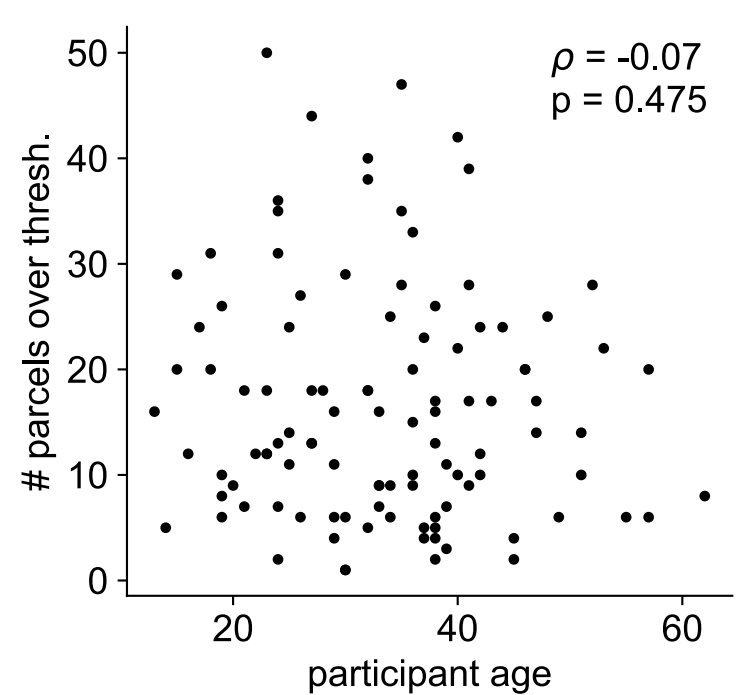**D** parcel coverage map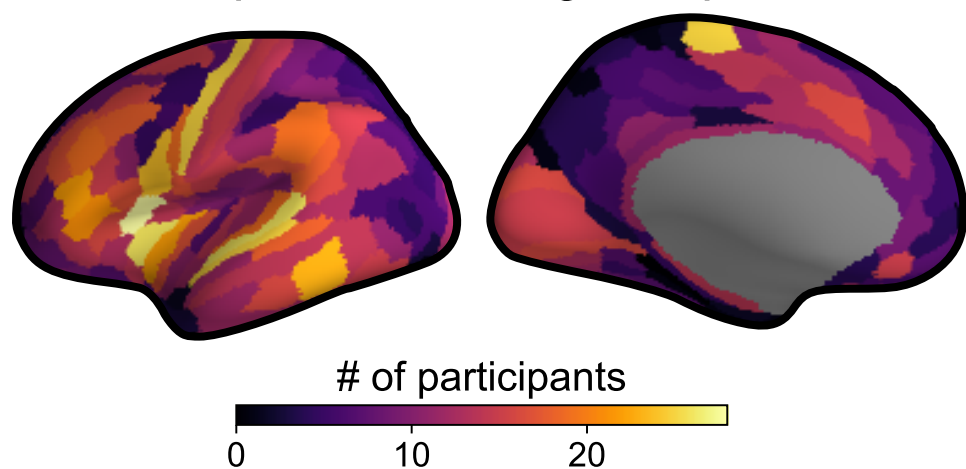**E** parcel-average age map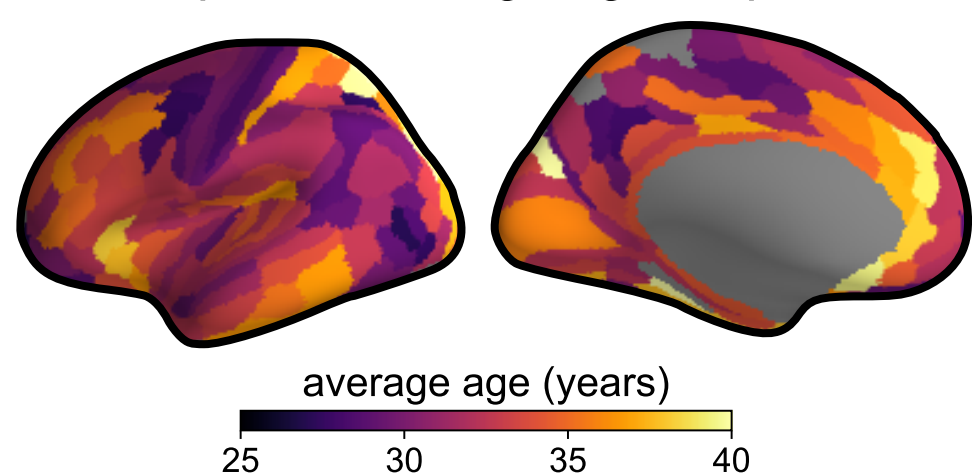**F** age distribution per parcel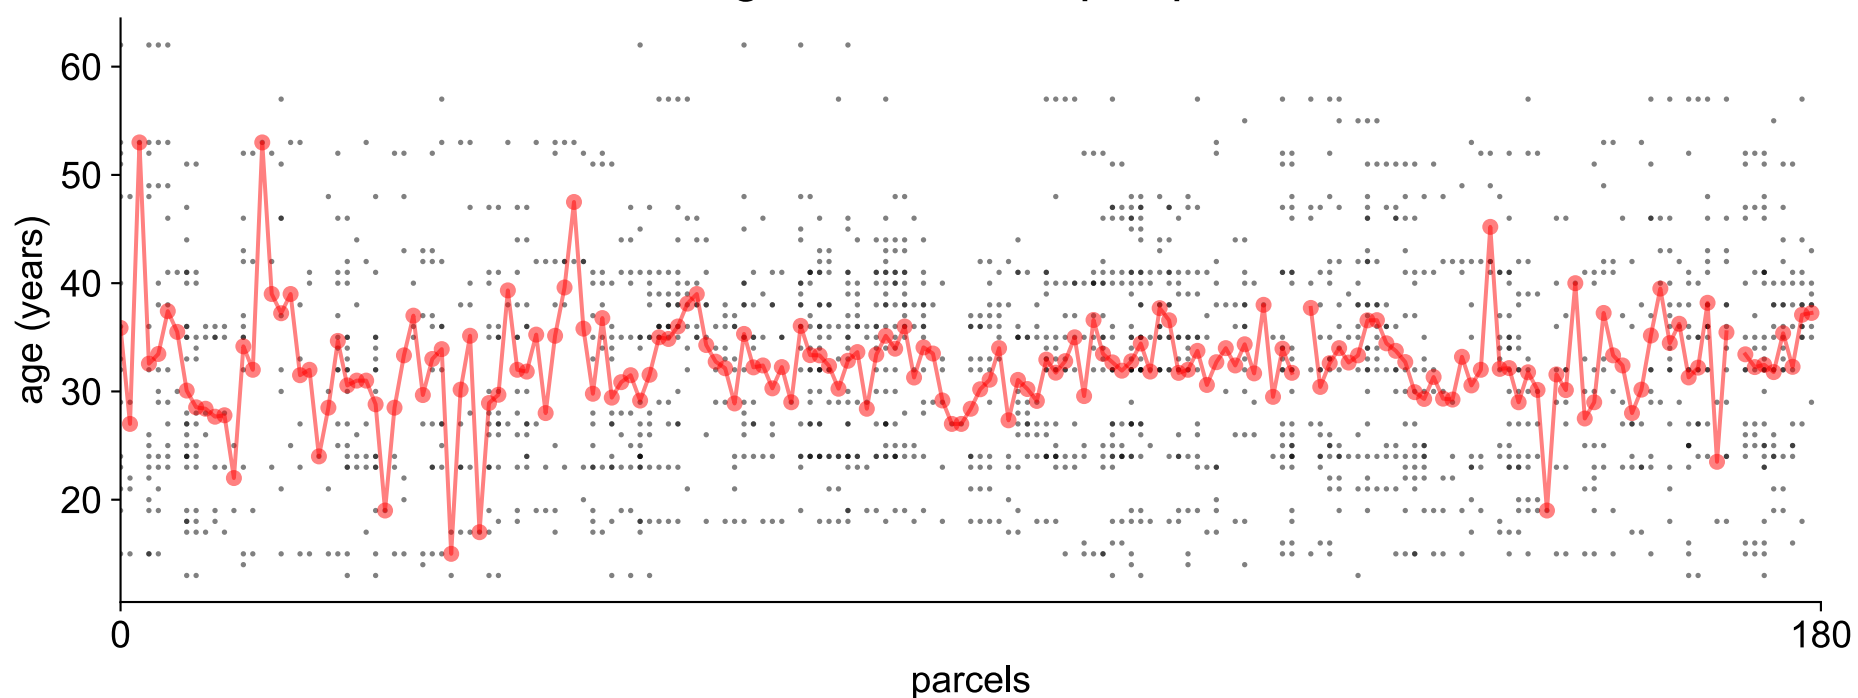**G**

Glasser macro-parcels sorted by timescale

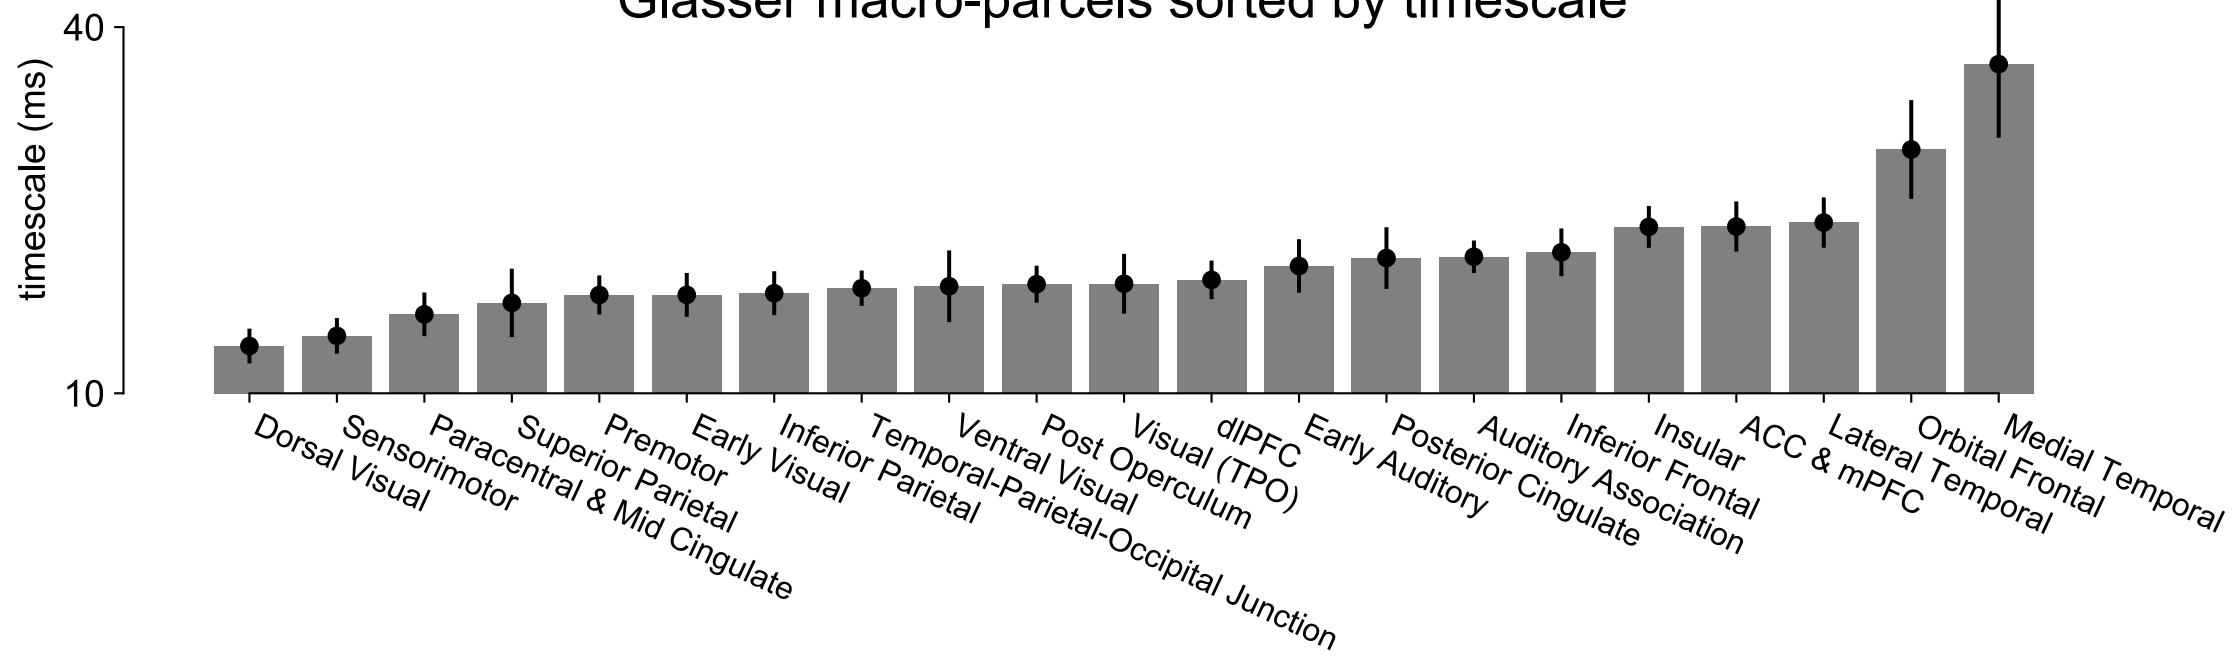

Supplement: supp [file elife-61277-supp-v1.zip › elife_poa_e61277_Figure_2_figure_supplement_1.pdf]
