# Supplementary material for: Neuronal timescales are functionally dynamic and shaped by cortical microarchitecture
Source: eLife journal article supplement (doi:10.7554/elife.61277), 2020-11-23

**A**

## null distribution of timescale-T1w/T2w correlation

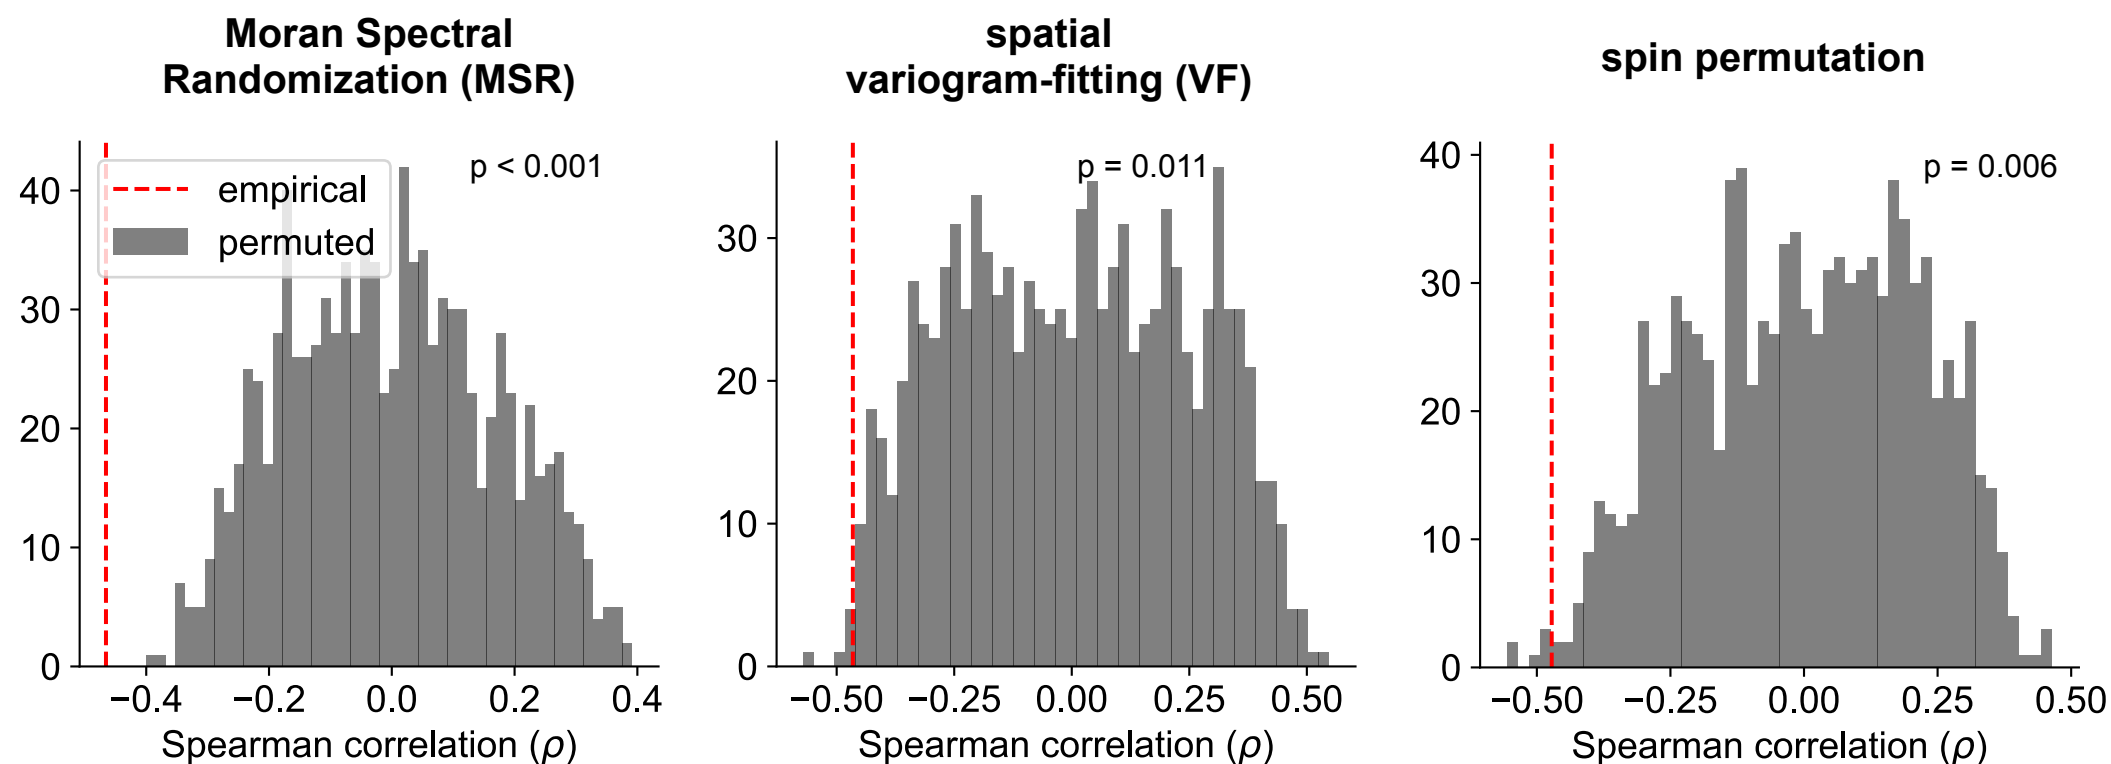**B**

## spatial variogram

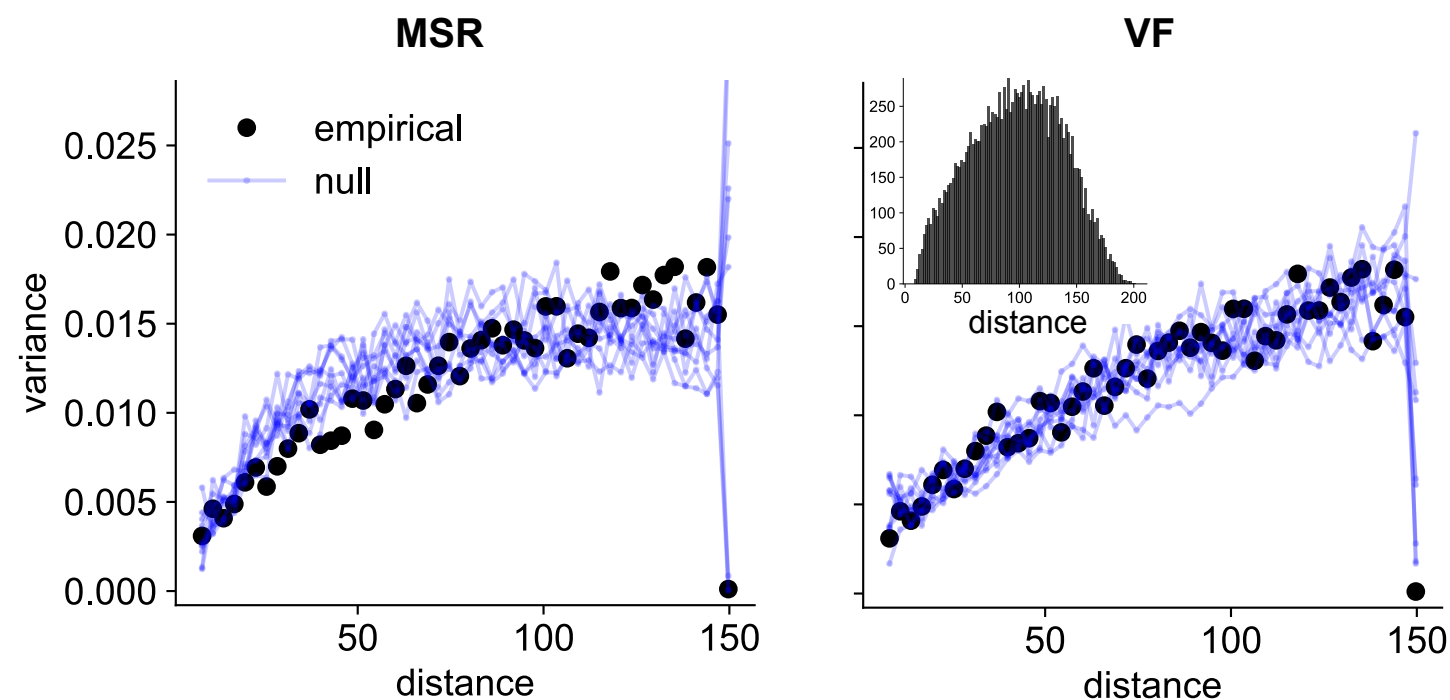**C**empirical-null  
map correlation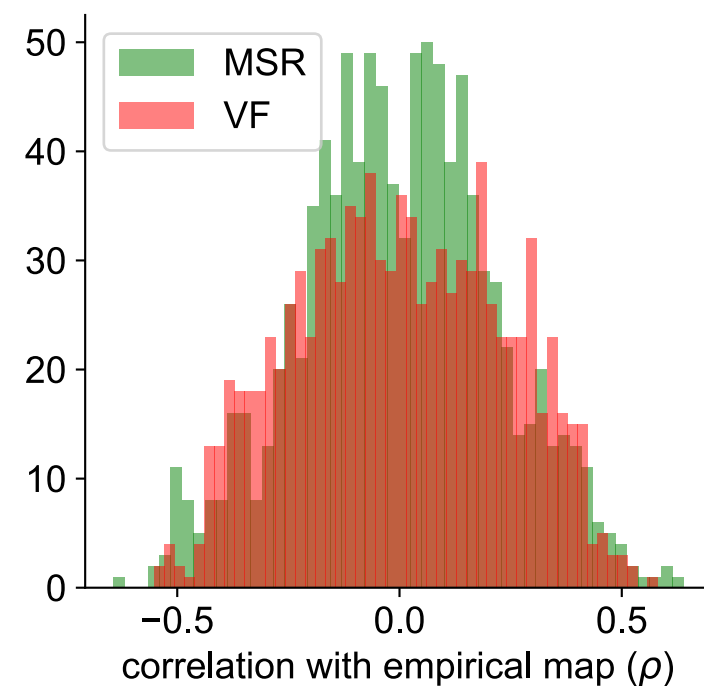

Supplement: supp [file elife-61277-supp-v1.zip › elife_poa_e61277_Figure_2_figure_supplement_2.pdf]
