# Supplementary material for: Neuronal timescales are functionally dynamic and shaped by cortical microarchitecture
Source: eLife journal article supplement (doi:10.7554/elife.61277), 2020-11-23
Supplement: supp [file elife-61277-supp-v1.zip › elife_poa_e61277_Figure_2_figure_supplement_4.pdf]

**A**

macaque ECoG electrode locations

**George****Chibi**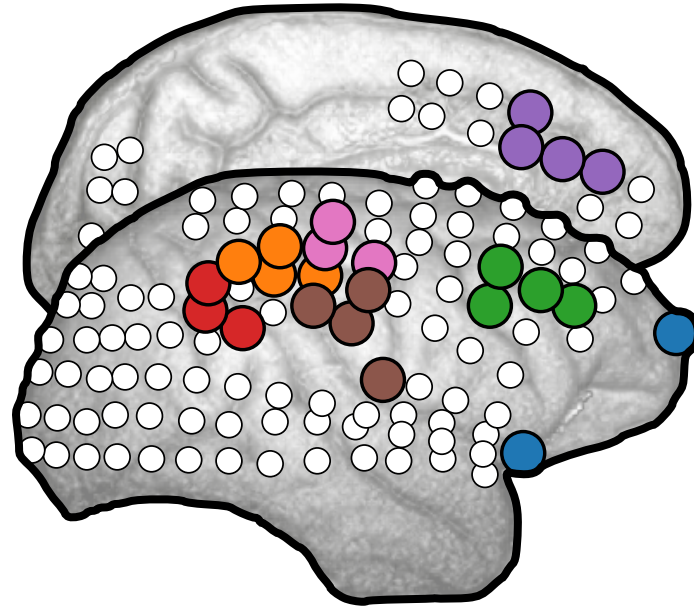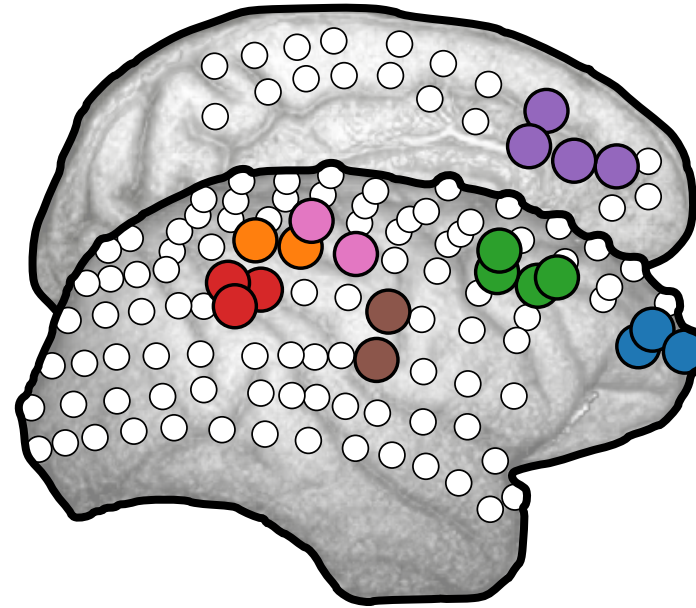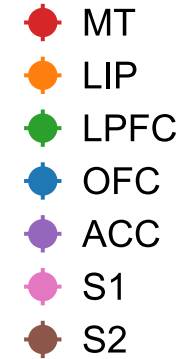**B**

indices of ECoG electrodes (1-based indexing)

|               | MT        | LIP            | LPFC           | OFC        | ACC            | S1         | S2           |
|---------------|-----------|----------------|----------------|------------|----------------|------------|--------------|
| <b>George</b> | 4, 13, 22 | 10, 11, 20, 21 | 15, 24, 25, 26 | 45, 66     | 52, 57, 58, 59 | 18, 19, 30 | 1, 2, 9, 108 |
| <b>Chibi</b>  | 3, 4, 109 | 10, 11         | 15, 25, 25, 26 | 23, 34, 45 | 52, 57, 58, 59 | 9, 19      | 95, 108      |
