# Supplementary material for: Neuronal timescales are functionally dynamic and shaped by cortical microarchitecture
Source: eLife journal article supplement (doi:10.7554/elife.61277), 2020-11-23

**A**

## feature difference between delay and baseline

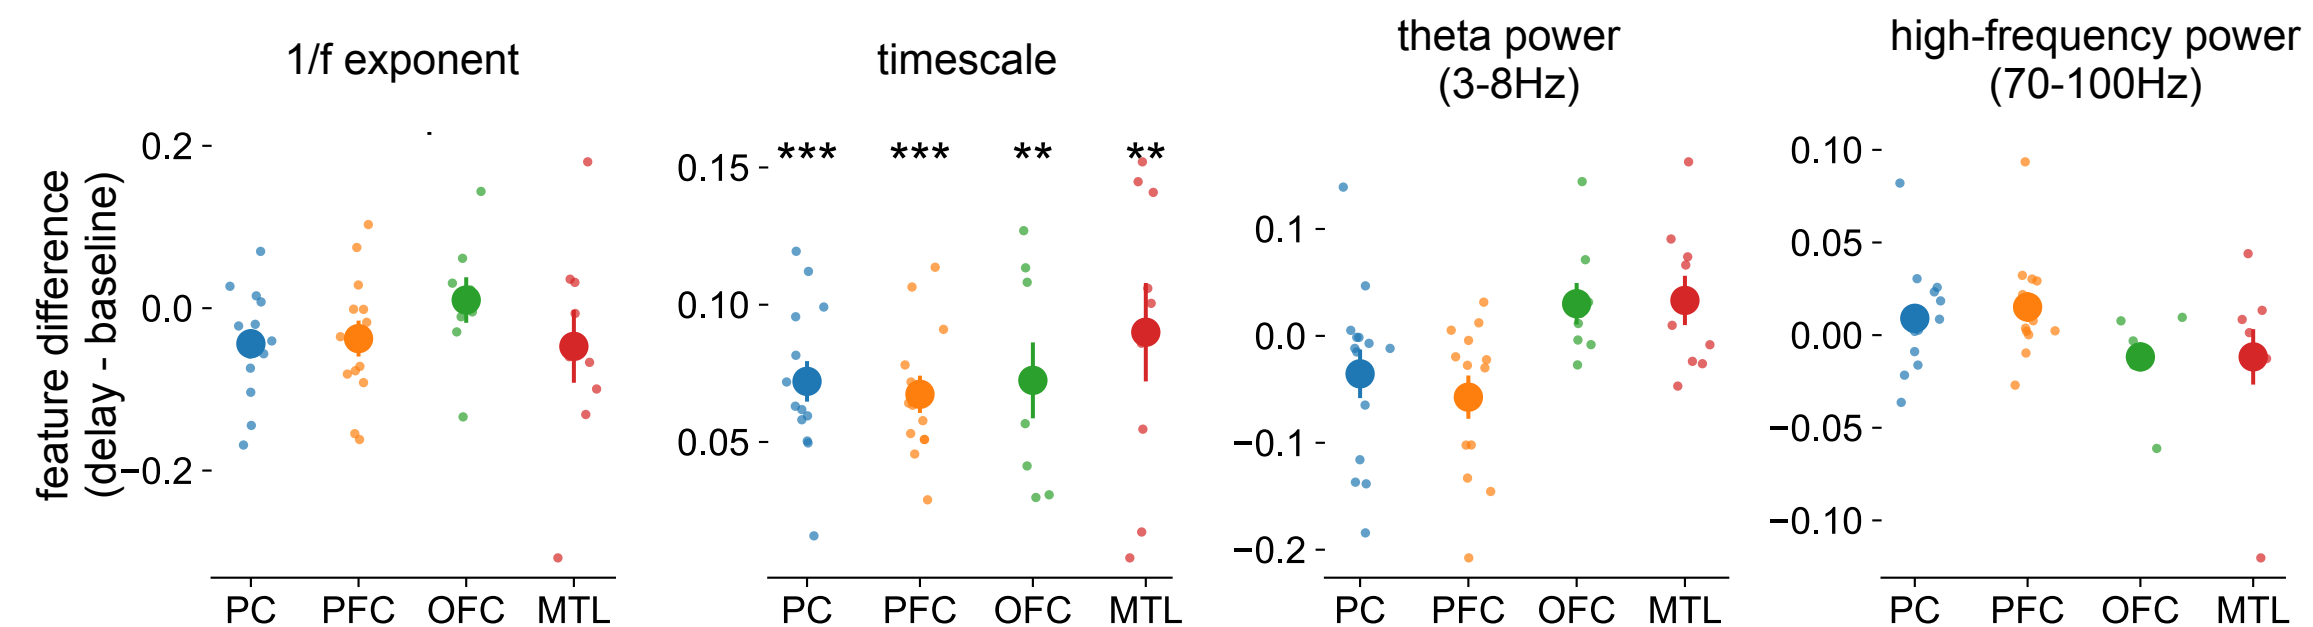**B**

## correlation with working memory accuracy

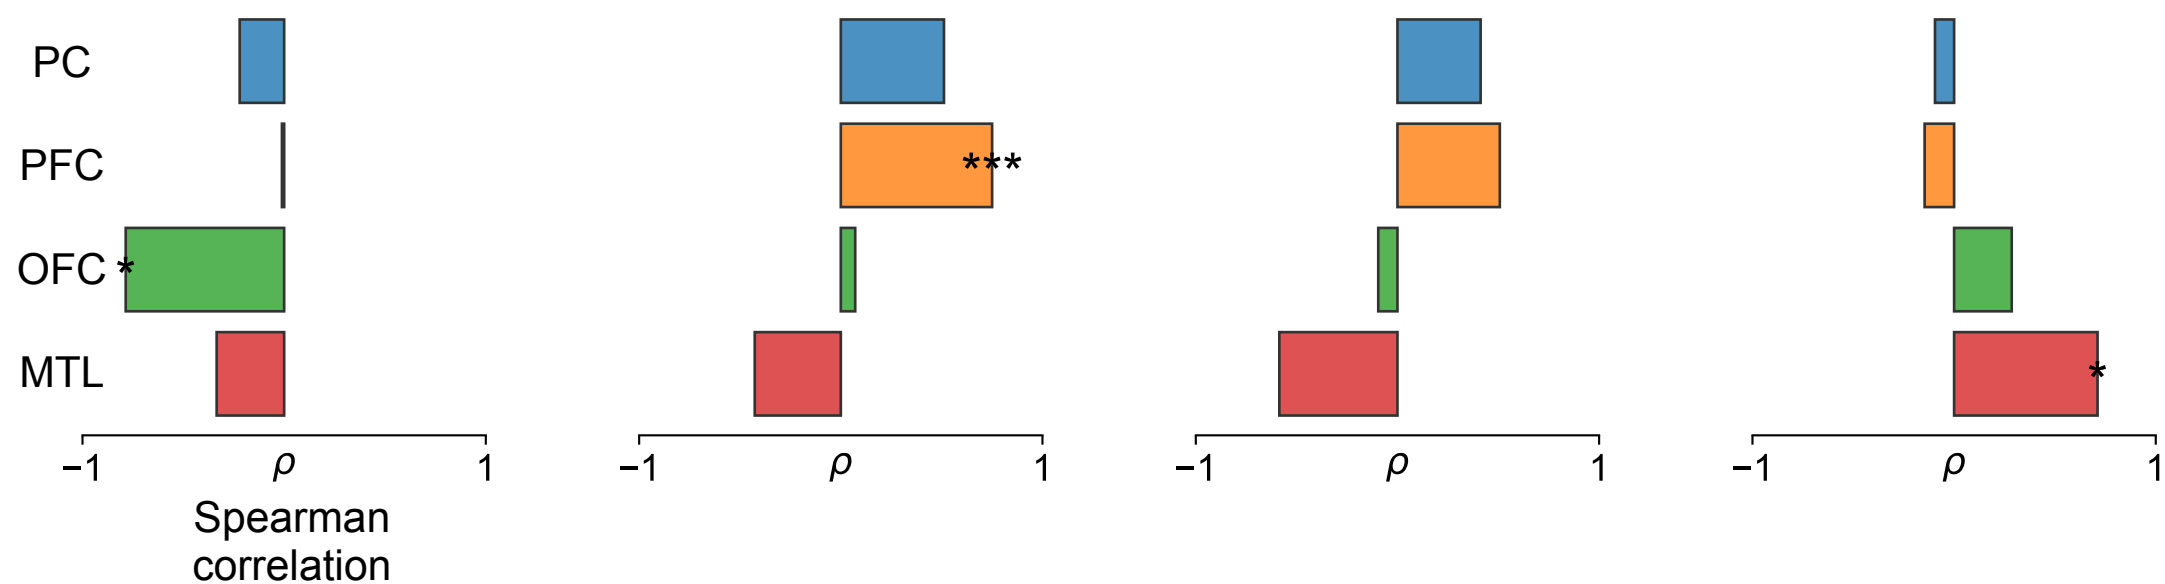**C**

## other significantly correlated features

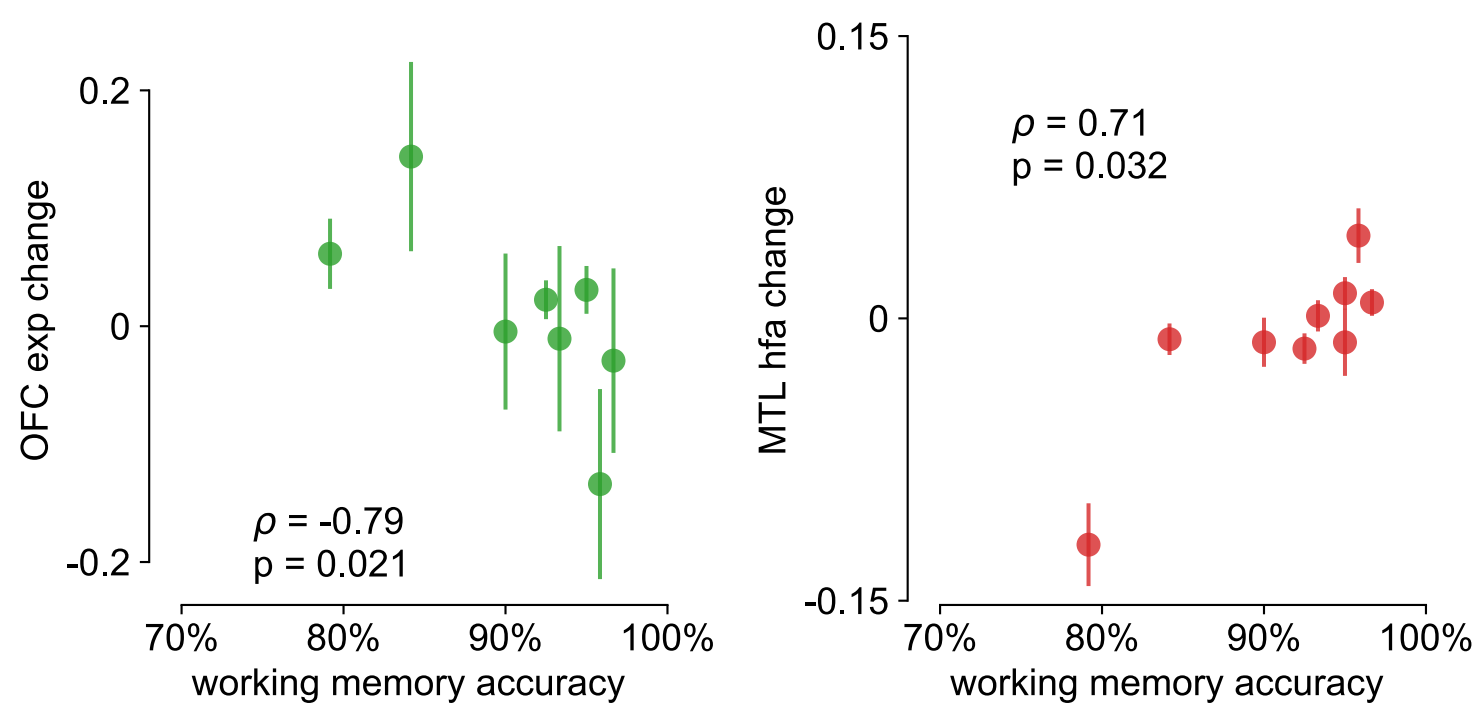

Supplement: supp [file elife-61277-supp-v1.zip › elife_poa_e61277_Figure_4_figure_supplement_1.pdf]
