# Supplementary figures and images for: Neuronal timescales are functionally dynamic and shaped by cortical microarchitecture
Source: eLife journal article supplement (doi:10.7554/elife.61277), 2020-11-23

# cortical thickness vs. timescale and T1w/T2w

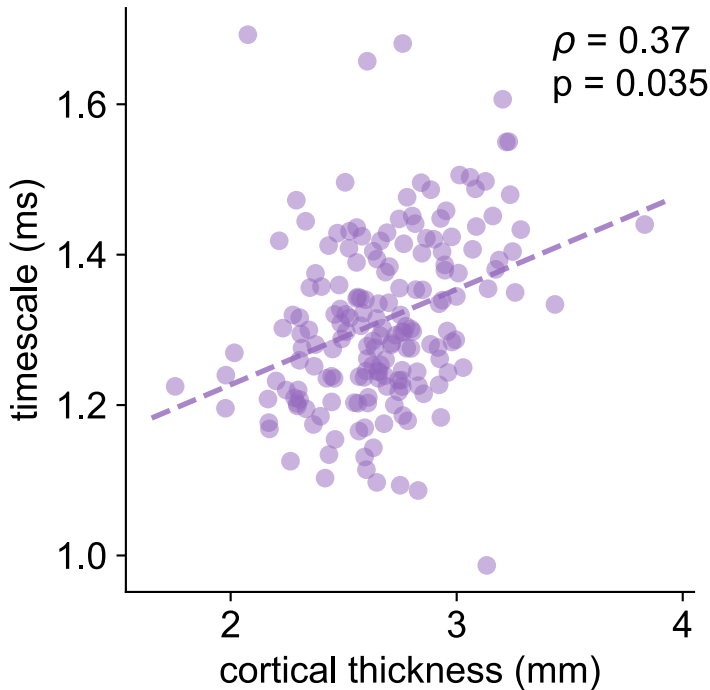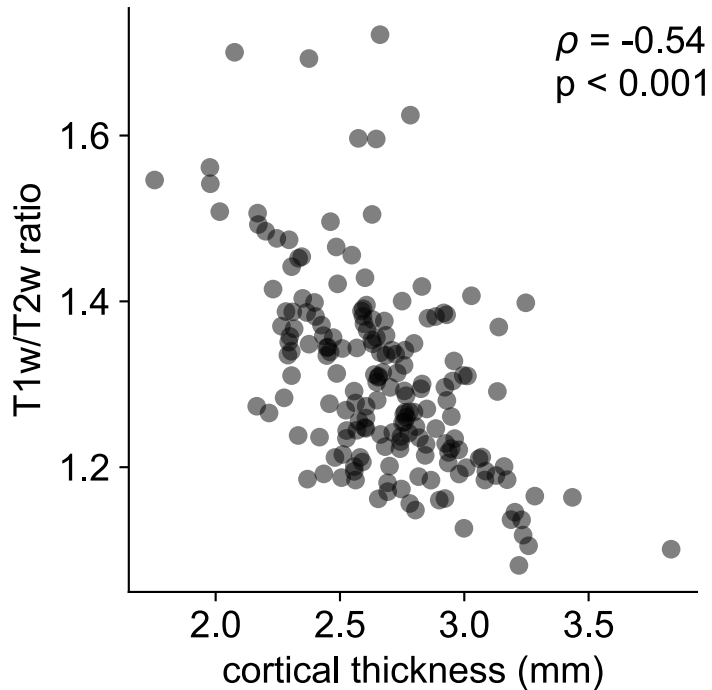

Supplement: supp [file elife-61277-supp-v1.zip › elife_poa_e61277_Figure_2_figure_supplement_3.pdf]

brain genes (2429)

**A** variance explained

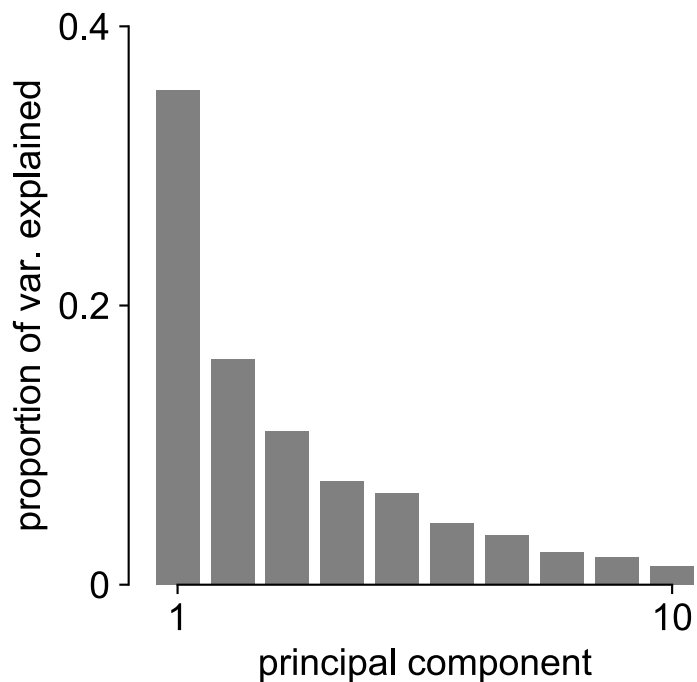

**B** timescale correlation by PC

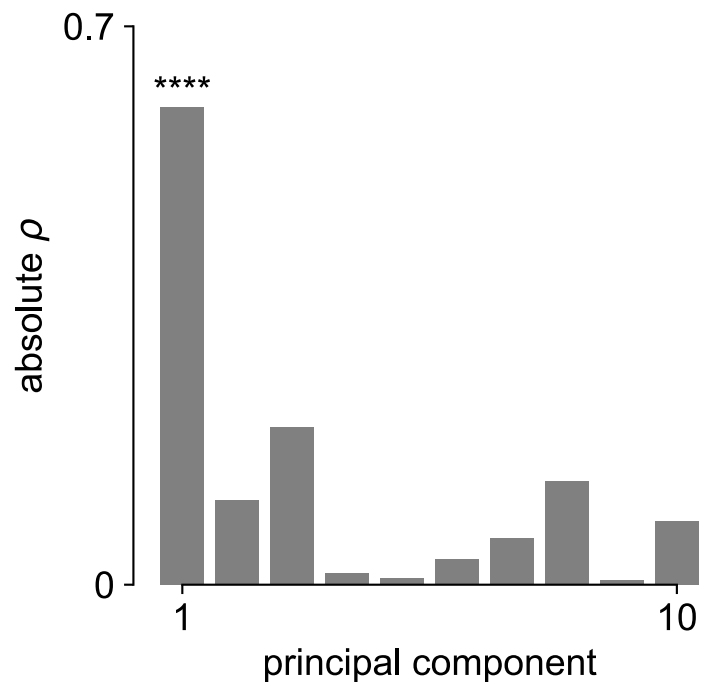

all genes (18114)

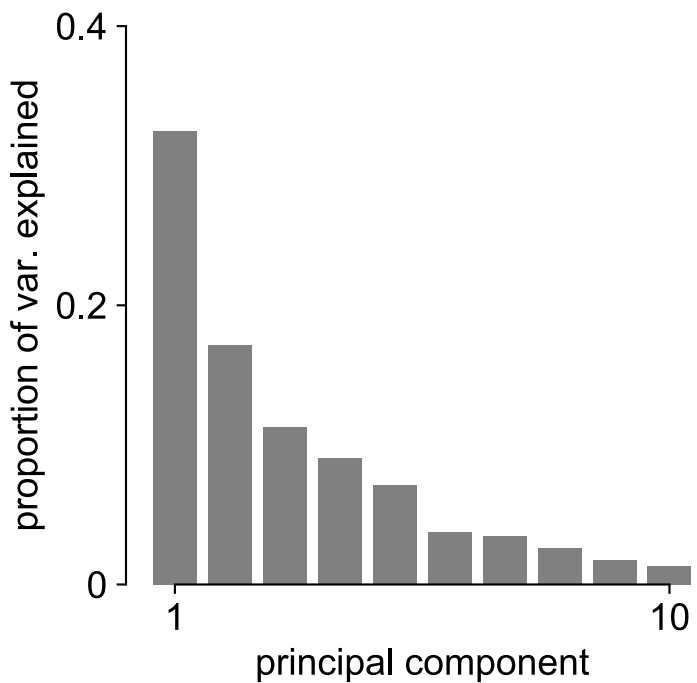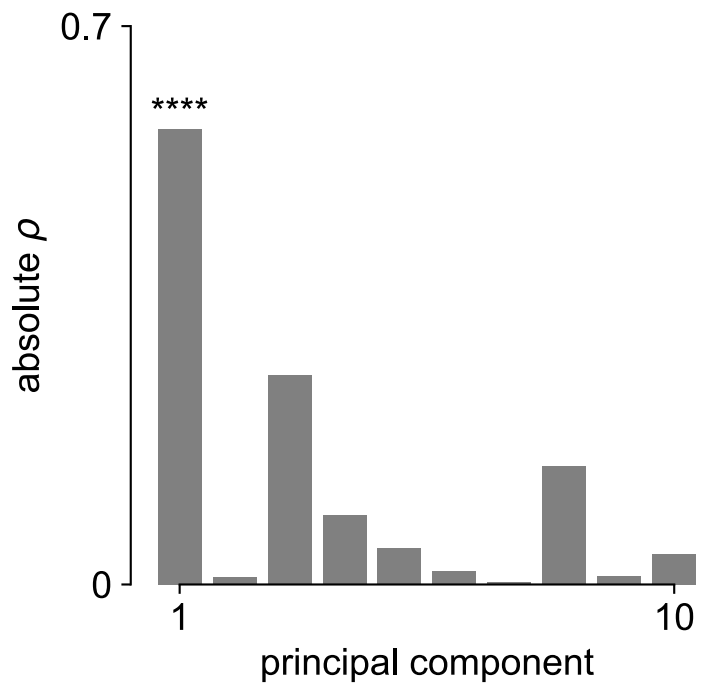

Supplement: supp [file elife-61277-supp-v1.zip › elife_poa_e61277_Figure_3_figure_supplement_1.pdf]

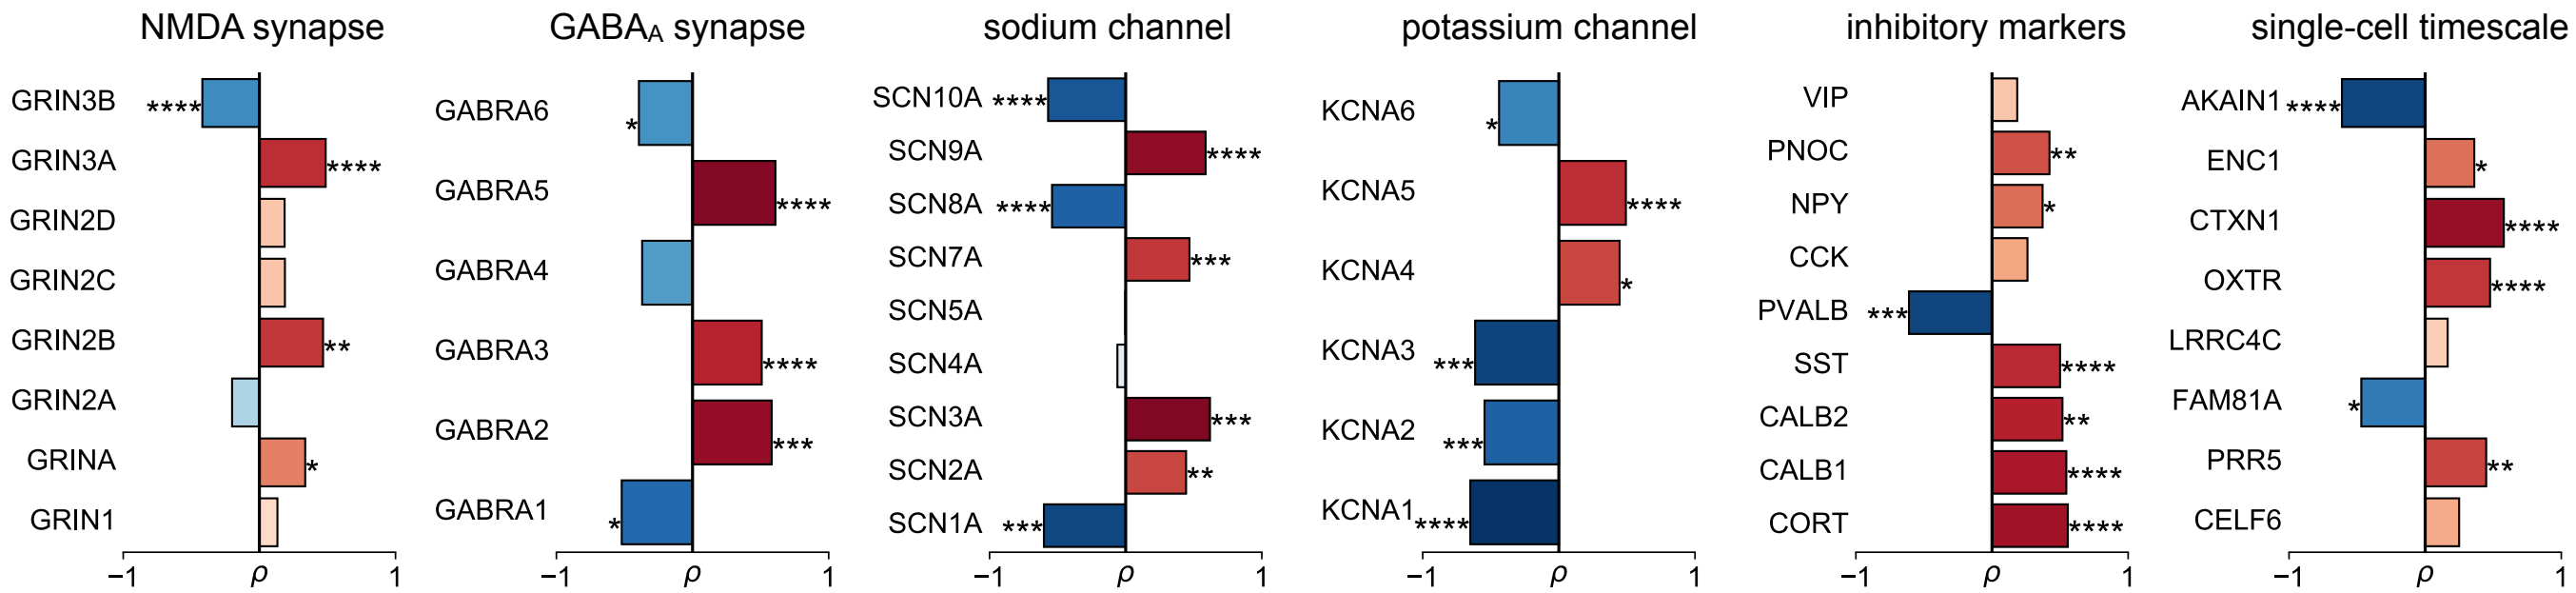

Supplement: supp [file elife-61277-supp-v1.zip › elife_poa_e61277_Figure_3_figure_supplement_2.pdf]

**A**

coverage dependence

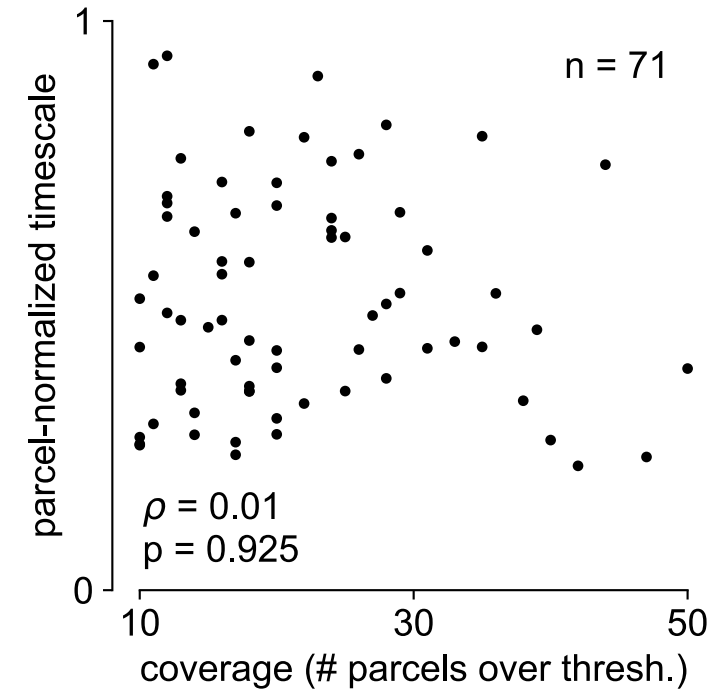**B**

min. parcel threshold

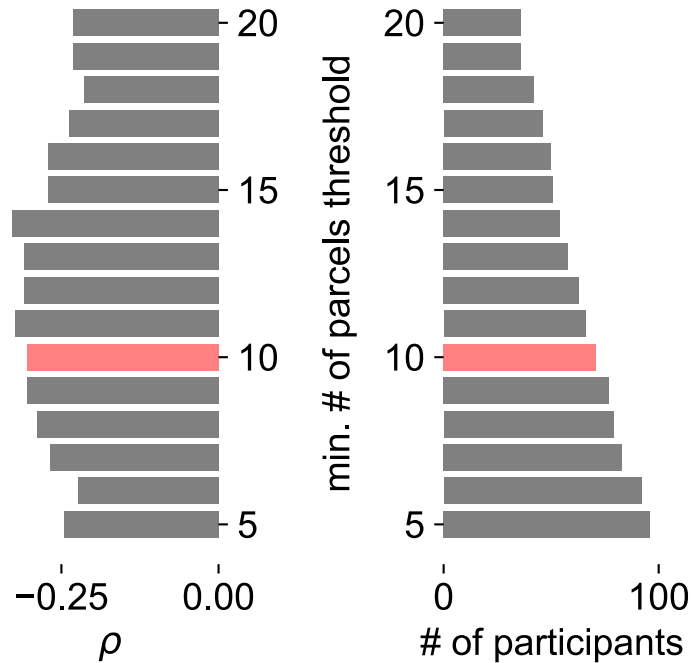**C**

min. subject threshold

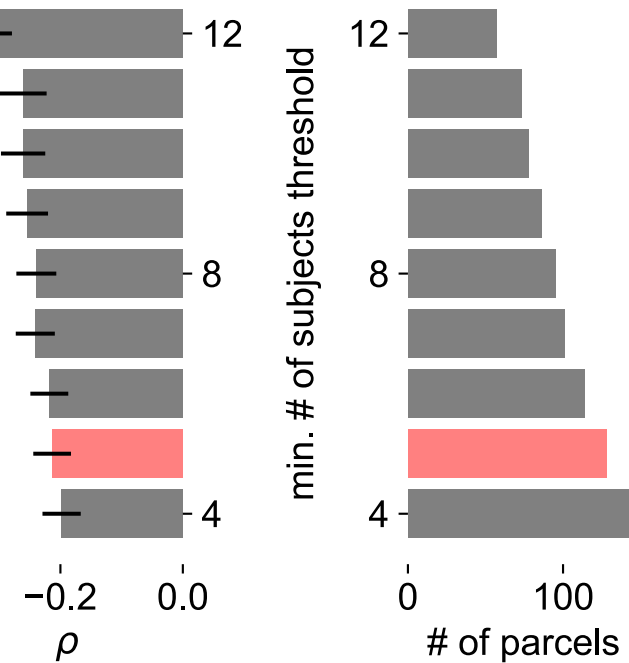

Supplement: supp [file elife-61277-supp-v1.zip › elife_poa_e61277_Figure_4_figure_supplement_2.pdf]
